# Supplementary material for: Effects of antibiotic antitumor drugs on nucleotide levels in cultured tumor cells: an exploratory method to distinguish the mechanisms of antitumor drug action based on targeted metabolomics
Source: PubMed Central journal article supplement — Acta Pharm Sin B. 2015 Apr 8;5(3):223–30. doi: 10.1016/j.apsb.2015.03.010 (PMC4629260; doi:10.1016/j.apsb.2015.03.010), 2015-04-08

**Figure S1** The comparison of 12 nucleotides in 12 cell lines in the control group and drug (DNR, ACD and EPI)-treated groups for 48 h.

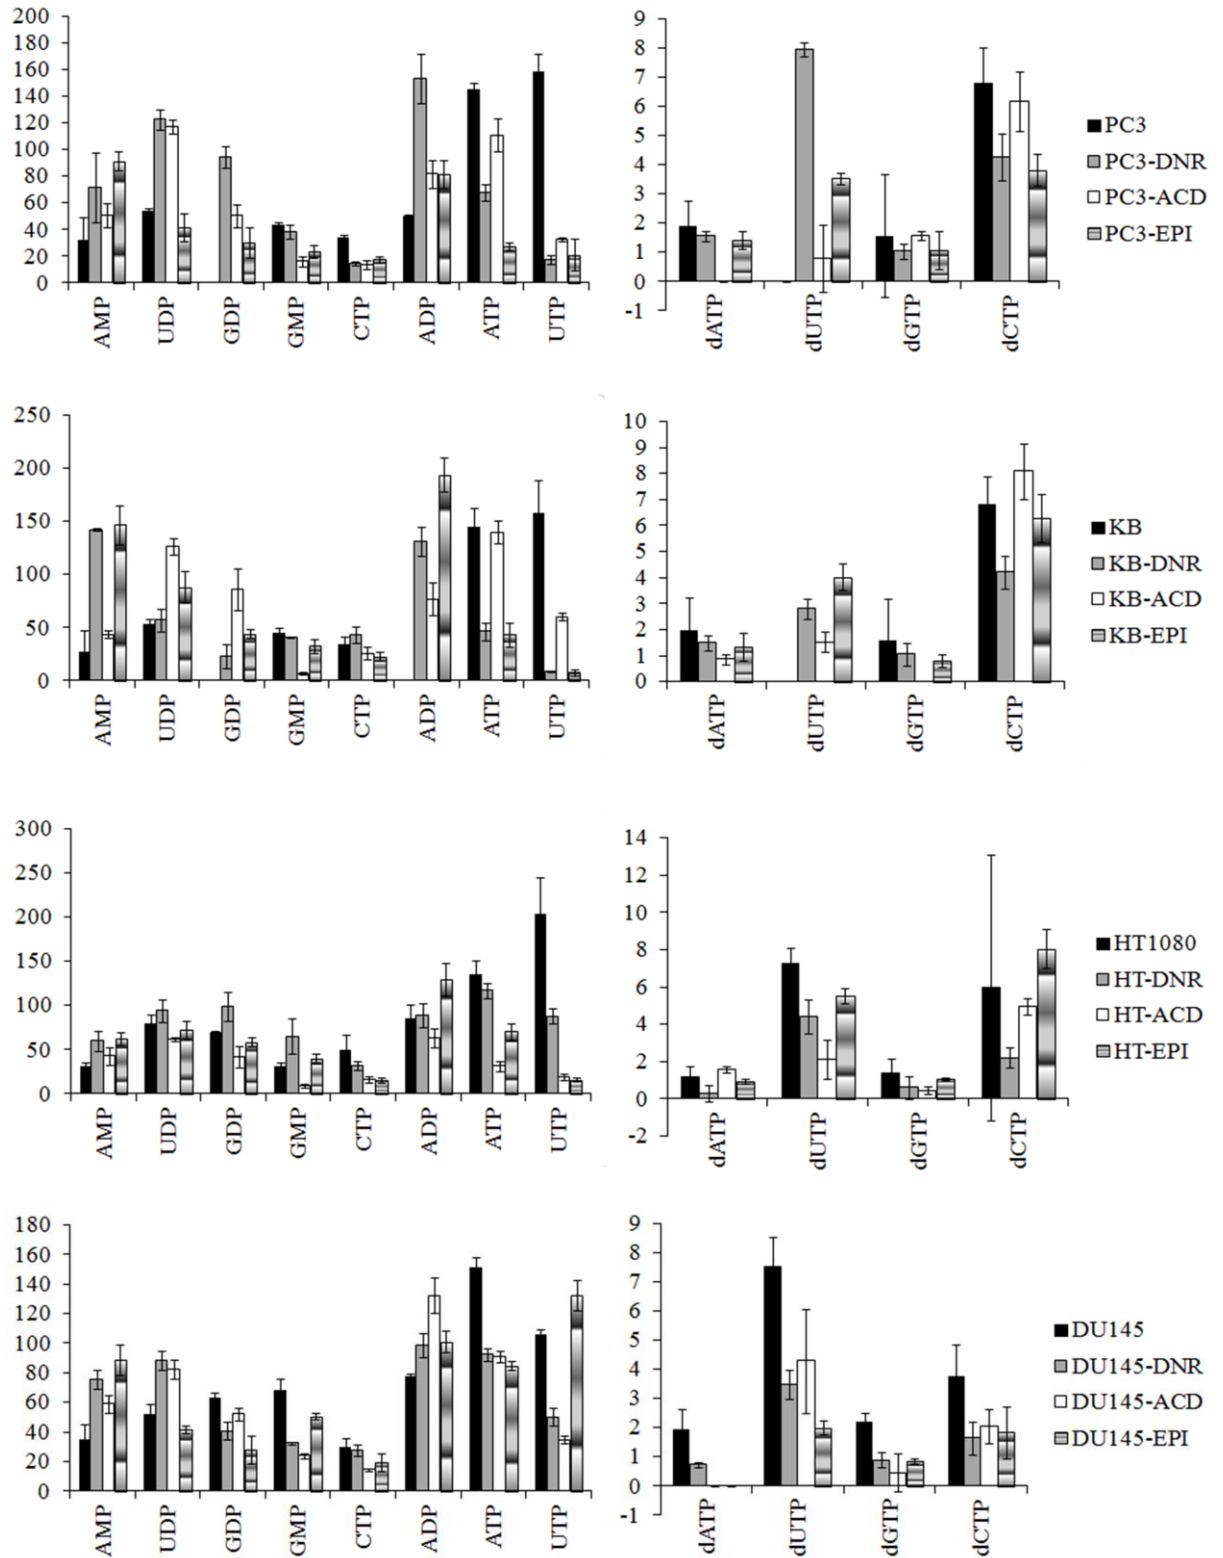

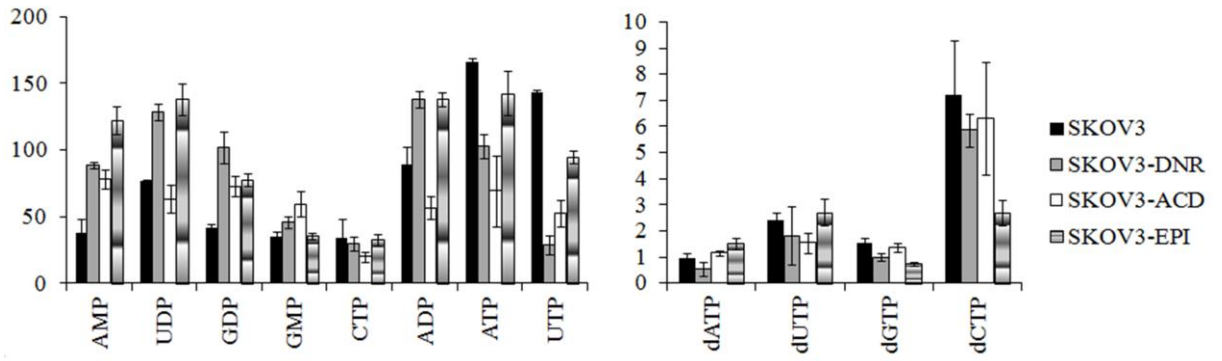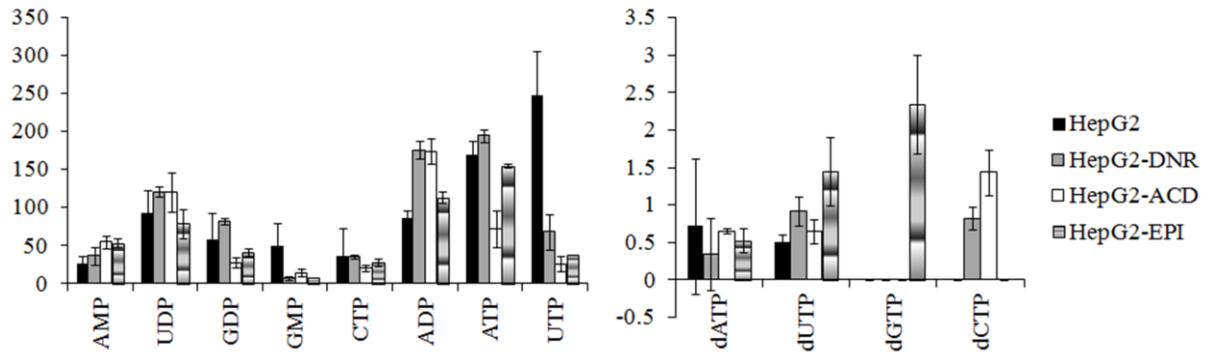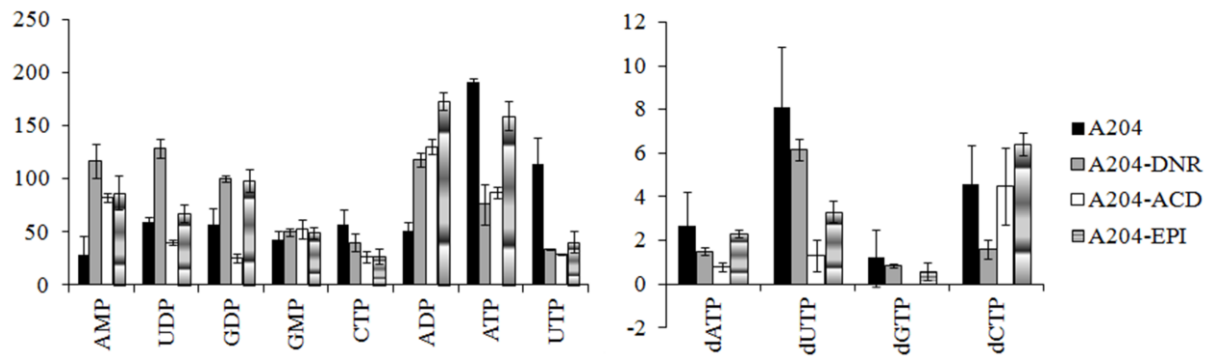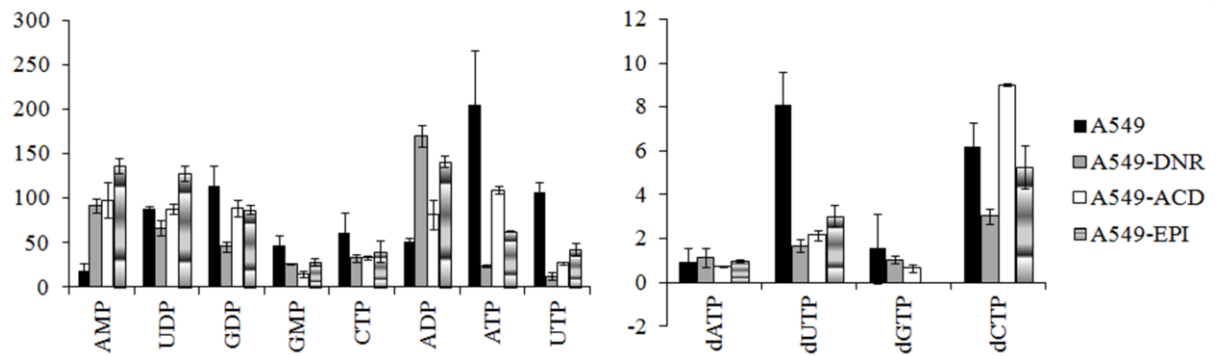

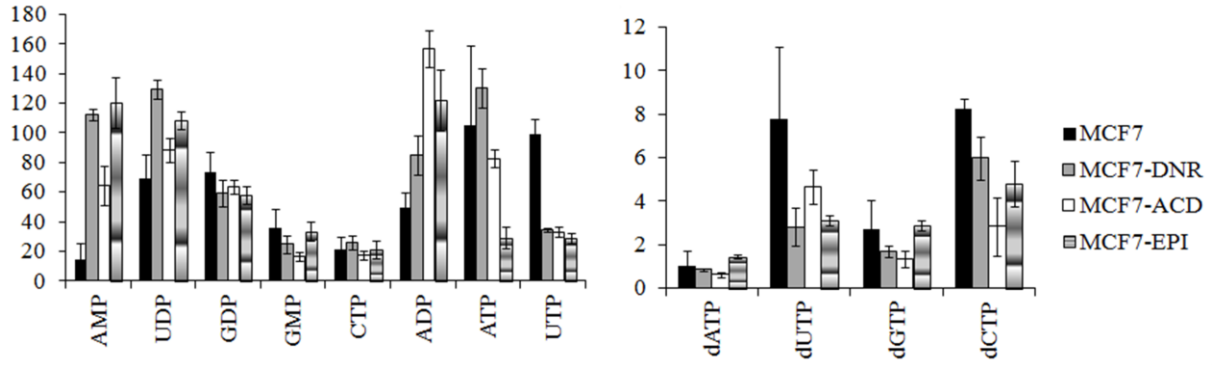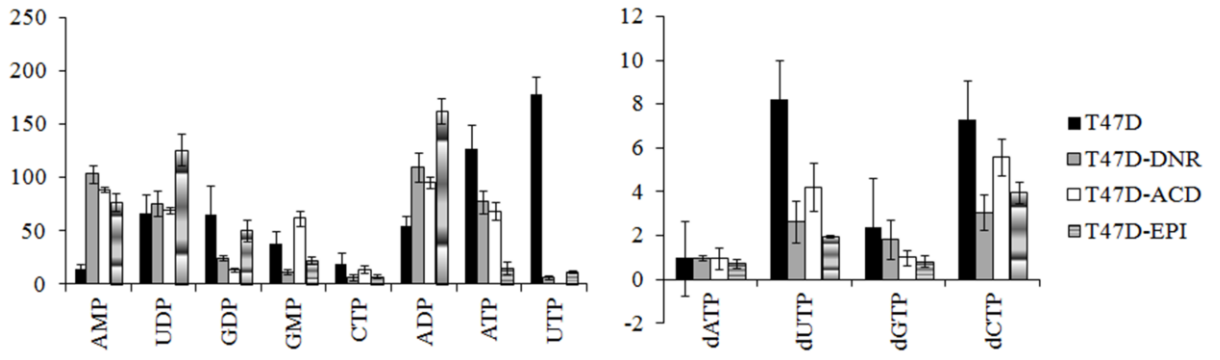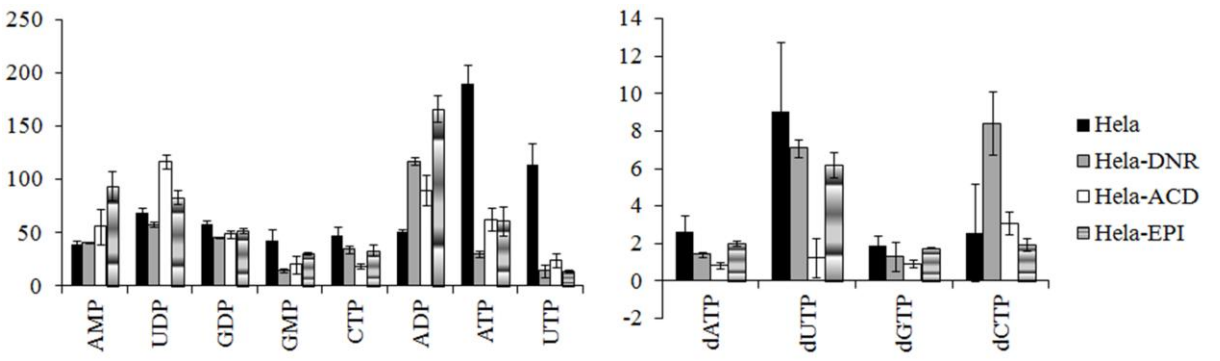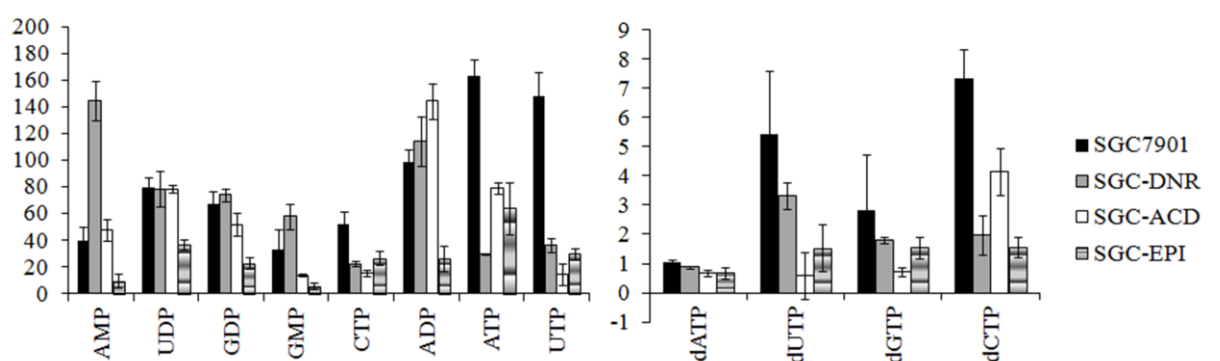

Supplement: mmc1.pdf [file mmc1.pdf]
